# Supplementary material for: Identification and impact on Pseudomonas aeruginosa virulence of mutations conferring resistance to a phage cocktail for phage therapy
Source: PubMed Central journal article supplement (PMC10714927; doi:10.1128/spectrum.01477-23), 2023-11-15
Supplement: spectrum.01477-23-s0001.pdf [file spectrum.01477-23-s0001.pdf]

**Table S1. Bacteria, phages and plasmids**

| <i>Bacteria</i>       |                                                        |                              |                                    |
|-----------------------|--------------------------------------------------------|------------------------------|------------------------------------|
| Name                  | Mutated gene/mutation                                  | Position(s) <sup>a</sup>     | Reference                          |
| <i>P. aeruginosa</i>  |                                                        |                              |                                    |
| PAO1                  |                                                        |                              | (Klockgether <i>et al.</i> , 2010) |
| 4a                    | <i>wzy</i> /(T) <sub>7→8</sub>                         | 3,538,995                    | (Li <i>et al.</i> , 2023)          |
| PADR2                 | <i>wzy</i> /(T) <sub>7→8</sub> ;<br><i>pilS</i> /+ACAC | 3,538,995;<br>5,094,104      | This work                          |
| PADR3                 | <i>wzy</i> /(T) <sub>7→6</sub> ;<br><i>pilQ</i> /G→A   | 3,538,995;<br>5,675,986      | This work                          |
| PADR6                 | <i>wzy</i> /(C) <sub>5→4</sub>                         | 3,538,225                    | This work                          |
| PAER5b                | <i>wapH</i> /C→A                                       | 5,622,039                    | This work                          |
| PAER6b                | <i>galU</i> /Δ1                                        | 2,215,180                    | This work                          |
| PAER10b               | <i>algC</i> /A→T                                       | 5,992,863                    | This work                          |
| PAMO301               | Δ <i>wzy</i>                                           | 3537852-3539080              | This work                          |
| PAMO302               | Δ <i>pilQ</i>                                          | 5675815-5677859 <sup>d</sup> | This work                          |
| <i>E. coli</i>        |                                                        |                              |                                    |
| CC118λpir             |                                                        |                              | (Herrero <i>et al.</i> , 1990)     |
| DH10B                 |                                                        |                              | (Grant <i>et al.</i> , 1990)       |
| HB101                 |                                                        |                              | (Boyer and Roulland-Dussoix, 1969) |
| <i>Bacteriophages</i> |                                                        |                              |                                    |
| Name                  | Original name <sup>b</sup>                             | Isolation <sup>c</sup> :     | Reference/Origin                   |
| <i>CK4 components</i> |                                                        |                              |                                    |
| DEV                   | DV3-EV                                                 | PAO1                         | (Forti <i>et al.</i> , 2018)       |
| E215                  | E215-AG5a                                              | AG5                          | (Forti <i>et al.</i> , 2018)       |
| E217                  | E217-AG5                                               | AG5                          | (Forti <i>et al.</i> , 2018)       |
| PYO2                  | 2.                                                     | PAO1                         | (Forti <i>et al.</i> , 2018)       |
| <i>Other phages</i>   |                                                        |                              |                                    |
| B213                  | B213a-AG5                                              | AG5                          | (Forti <i>et al.</i> , 2018)       |
| DV1                   | DV-CC                                                  | PAO1                         | (Forti <i>et al.</i> , 2018)       |
| E10                   | E1-b                                                   | E1                           | (Forti <i>et al.</i> , 2018)       |
| E219                  | E215-AG5                                               | AG5                          | (Forti <i>et al.</i> , 2018)       |
| E221                  | E220-PAO1a                                             | PAO1                         | (Forti <i>et al.</i> , 2018)       |

|      |            |      |                              |
|------|------------|------|------------------------------|
| S218 | S218-GS3b  | GS3  | (Forti <i>et al.</i> , 2018) |
| S220 | S220-AG5   | AG5  | (Forti <i>et al.</i> , 2018) |
| S221 | S220-PAO1b | PAO1 | (Forti <i>et al.</i> , 2018) |
| AD1  | na         | PAO1 | This work/Adda river         |
| AD2  | na         | PAO1 | This work/Adda river         |
| MI1  | na         | PAO1 | This work/Mincio river       |
| MI2  | na         | PAO1 | This work/Mincio river       |
| OG1  | na         | PAO1 | This work/Oglio river        |
| OG2  | na         | PAO1 | This work/Oglio river        |
| TI1  | na         | PAO1 | This work/Ticino river       |

---

*Plasmids*

| <b>Name</b> | <b>Relevant features<sup>a</sup></b>                                                                                                                     | <b>Reference</b>                  |
|-------------|----------------------------------------------------------------------------------------------------------------------------------------------------------|-----------------------------------|
| pRK2013     | Plasmid mobilization <i>via</i> conjugation                                                                                                              | (Figurski <i>et al.</i> , 1979)   |
| pKNG101     | Suicide vector in <i>P. aeruginosa</i>                                                                                                                   | (Kaniga <i>et al.</i> , 1991)     |
| pGM931      | pHERD20T derivative carrying <i>araBp</i> -t $\Omega$ region                                                                                             | (Delvillani <i>et al.</i> , 2014) |
| pGM2144     | pKNG101 derivatives; carries <i>wzy</i> upstream<br>3539532- 3539080 and 3537852- 3537362<br>downstream fragments                                        | This work                         |
| pGM2149     | pKNG101 derivatives; carries <i>pilQ</i> upstream<br>5678358-5677859 and 5675815-5675376<br>downstream fragments                                         | This work                         |
| pGM-algC    | <i>alias</i> name pGM2158; pGM931 derivative carrying<br>the <i>algC</i> gene (5944663-5947269) cloned in <i>KpnI</i><br>under the <i>araBp</i> promoter | This work                         |
| pGM-galU    | <i>alias</i> name pGM2142; pGM931 derivative carrying<br>the <i>galU</i> gene (3299887-3300726) cloned in <i>KpnI</i><br>under the <i>araBp</i> promoter | This work                         |
| pGM-wapH    | <i>alias</i> name pGM2143; pGM931 derivative carrying<br>the <i>wapH</i> gene (5575415-5576551) cloned in <i>KpnI</i><br>under the <i>araBp</i> promoter | This work                         |
| pGM-wzy     | <i>alias</i> name pGM2147; pGM931 derivative carrying<br>the <i>wzy</i> gene (1976704-1978020) cloned in <i>KpnI</i><br>under the <i>araBp</i> promoter  | This work                         |

---

<sup>a</sup>Coordinates refer to Genbank Accession Number NC\_002516.2

<sup>b</sup>As reported in Forti *et al.*, 2018; na, not applicable

*P. aeruginosa* strain on which they were originally isolated (Forti et al., 2018; this work)

**Table S2. Genomic sequencing results**

| Strain              | Number of Reads (L) <sup>a</sup> | Mean Read Length (nt; N) <sup>a</sup> | Coverage <sup>a</sup> | Frequency of the relevant mutation <sup>b</sup> |
|---------------------|----------------------------------|---------------------------------------|-----------------------|-------------------------------------------------|
| PACR1c              | 7,835,193                        | 146.2                                 | 183.6                 | 99%; 194                                        |
| PACR2a              | 7,873,090                        | 146.1                                 | 184.7                 | 99%; 177                                        |
| PACR3b              | 6,394,347                        | 145.2                                 | 147.9                 | 97%; 173                                        |
| PACK5a              | 7,249,932                        | 146.3                                 | 170.3                 | 100%; 168                                       |
| PACR6b              | 7,276,424                        | 146.3                                 | 170.9                 | 98%; 138                                        |
| PACR7a              | 7,273,037                        | 146.5                                 | 170.6                 | 100%; 152                                       |
| PADR1               | 5,447,270                        | 144.5                                 | 126.3                 | 98%; 130                                        |
| PADR2               | 7,787,448                        | 146.7                                 | 183.5                 | 99%; 166                                        |
| PADR3               | 7,753,539                        | 145.7                                 | 181.8                 | 100%; 135                                       |
| PADR4               | 7,367,643                        | 146.7                                 | 174.1                 | 100%; 184                                       |
| PADR5               | 8,324,142                        | 146.1                                 | 195.5                 | 99%; 175                                        |
| PADR6               | 6,807,485                        | 146.1                                 | 159.8                 | 98%; 165                                        |
| PAER4b <sup>b</sup> | 6,645,502                        | 145.9                                 | 159.3                 | 0; 132                                          |
| PAER5b              | 8,194,017                        | 146.1                                 | 191.7                 | 100%; 164                                       |
| PAER6b              | 7,791,848                        | 146.5                                 | 183.3                 | 99%; 161                                        |
| PAER7a              | 8,033,914                        | 146.2                                 | 188.2                 | 98; 195                                         |
| PAER9a <sup>b</sup> | 7,703,798                        | 146.5                                 | 194.4                 | 0; 215                                          |
| PAER10b             | 6,644,465                        | 146.4                                 | 156.2                 | 100%; 193                                       |
| PACRA3              | 3,749,262                        | 149.9                                 | 89.4                  | 97%; 63                                         |
| PACRL3              | 5,283,739                        | 149.4                                 | 124.3                 | 100%; 125                                       |
| PAO-1               | 7,117,974                        | 146.2                                 | 167.3                 | na                                              |
| PAO-1               | 8,909,119                        | 145.6                                 | 207.8                 | na                                              |

<sup>a</sup>The values were reported from the breseq Summary files of each sequenced genome. Coverage values were reported from the “fit mean” column in the Reference sequence Information table and can be calculated as LN/PAO1 genome size.

<sup>b</sup>Percentage of reads mutated; number of reads overlapping the mutated region. For large deletions (PAER4b and PAER9a), the number of reads covering the deleted region and the new junction are reported. na, not applicable

**Table S3. Polymorphisms of PAO1 lab strain**

| Position <sup>a</sup> | Mutation <sup>a</sup> | Involved gene(s) <sup>a</sup> |
|-----------------------|-----------------------|-------------------------------|
| 169,284               | Δ1                    | PA0148-PA0149                 |
| 183,697               | T→G                   | PA0159                        |
| 411,13                | (C)5→4                | PA0366-PA0367                 |
| 413,85                | T→C                   | PA0369-PA0370                 |
| 667,029               | +C                    | PA0604-PA0605                 |
| 721,611               | C→T                   | <i>tyrZ</i> -PA0668.1         |
| 721,622               | C→T                   | <i>tyrZ</i> -PA0668.1         |
| 816,532               | +C                    | PA0747-PA0749                 |
| 891,1                 | +C                    | PA0812-PA0813                 |
| 1,116,213             | +C                    | PA1029                        |
| 1,215,659             | +G                    | PA1122                        |
| 1,275,768             | Δ1                    | <i>napA</i>                   |
| 1,440,625             | Δ1                    | PA1327                        |
| 1,445,357             | +G                    | PA1332-PA1333                 |
| 1,467,482             | +G                    | PA1352-PA1353                 |
| 1,467,484             | +G                    | PA1352-PA1353                 |
| 1,589,438             | G→C                   | PA1459                        |
| 1,835,045             | +C                    | <i>masA</i>                   |
| 2,001,953             | G→A                   | <i>metH</i>                   |
| 2,140,942             | Δ166 bp               | PA1955-PA1956                 |
| 2,169,350             | +G                    | <i>exaA-exaB</i>              |
| 2,186,927             | +C                    | <i>dhcB-atoB</i>              |
| 2,195,462             | (C)5→6                | PA2006- <i>maiA</i>           |
| 2,239,547             | T→G                   | PA2046-PA2047                 |
| 2,239,555             | +G                    | PA2046-PA2047                 |
| 2,342,111             | +T                    | PA2127- <i>cupA1</i>          |
| 2,355,771             | +G                    | PA2139                        |

|           |                                      |                     |
|-----------|--------------------------------------|---------------------|
| 2,356,684 | Δ1                                   | PA2141              |
| 2,532,046 | +C                                   | <i>chiC</i> -PA2301 |
| 2,669,175 | G→C                                  | <i>pvdJ</i>         |
| 2,753,522 | +C                                   | PA2452              |
| 2,807,708 | (GCCGGCCA)2→1                        | <i>mexT</i>         |
| 2,807,982 | T→A                                  | <i>mexT</i>         |
| 2,810,986 | C→G                                  | <i>mexF</i>         |
| 3,016,845 | +C                                   | PA2668              |
| 3,083,196 | +G                                   | PA2727              |
| 3,311,262 | (AGCCGAACCGCCTTC<br>GGCGGCGACGGC)1→2 | <i>etfA</i>         |
| 3,919,508 | +C                                   | PA3503-PA3504       |
| 4,212,201 | A→G                                  | PA3760              |
| 4,344,266 | A→G                                  | <i>narK1</i>        |
| 4,448,855 | CG→GC                                | PA3969- <i>amn</i>  |
| 4,539,469 | +C                                   | PA4059              |
| 4,869,855 | T→G                                  | PA4341              |
| 4,888,194 | +G                                   | PA4360              |
| 4,895,782 | T→G                                  | <i>bifA</i>         |
| 4,924,552 | CG→GC                                | PA4394              |
| 5,033,101 | +C                                   | PA4496              |
| 5,035,093 | (TGCGG)2→3                           | PA4498              |
| 5,036,891 | A→C                                  | PA4499-PA4500       |
| 5,054,947 | Δ1 bp                                | PA4514              |
| 5,069,342 | T→C                                  | <i>pilA</i>         |
| 5,071,550 | (TGAC)2→1                            | <i>pilB-pilD</i>    |
| 5,253,694 | Δ1,006 bp                            | PA4684-PA4685       |
| 5,472,416 | +G                                   | PA4874-PA4875       |
| 5,655,230 | (GGC)3→4                             | PA5024              |
| 5,743,461 | CG→GC                                | <i>hutU</i>         |
| 6,079,222 | A→G                                  | <i>dgcB</i>         |

|           |     |             |
|-----------|-----|-------------|
| 6,098,781 | G→C | <i>soxA</i> |
| 6,115,455 | T→G | <i>mtr</i>  |

---

<sup>a</sup>Coordinates, polymorphisms and mutated gene(s) are indicated with respect to the reference PAO1 genome (NCBI accession N°AE004091.2). If the intergenic region is involved, the two flanking genes are reported.

**Table S4. *P. aeruginosa* strains analysed for phage susceptibility**

| <b>Name</b> | <b>Origin</b>         | <b>Reference</b>                   |
|-------------|-----------------------|------------------------------------|
| PAO1        | Clinical strain       | (Klockgether <i>et al.</i> , 2010) |
| PA14        | Clinical strain       | (Jander <i>et al.</i> , 2000)      |
| LESB58      | CF strain             | (Cheng <i>et al.</i> , 1996)       |
| E1          | Environmental isolate | (Bragonzi <i>et al.</i> , 2009)    |
| E2          | Environmental isolate | (Bragonzi <i>et al.</i> , 2009)    |
| E4          | Environmental isolate | (Bragonzi <i>et al.</i> , 2009)    |
| E9          | Environmental isolate | (Bragonzi <i>et al.</i> , 2009)    |
| AG5         | CF isolate            | (Forti <i>et al.</i> , 2018)       |
| GS3         | CF isolate            | (Forti <i>et al.</i> , 2018)       |
| AA10        | CF isolate            | (Forti <i>et al.</i> , 2018)       |
| GJY9        | CF isolate            | (Forti <i>et al.</i> , 2018)       |
| CL1         | CF isolate            | (Forti <i>et al.</i> , 2018)       |
| CL2         | CF isolate            | (Forti <i>et al.</i> , 2018)       |
| VR8         | CF isolate            | (Forti <i>et al.</i> , 2018)       |
| DV4         | CF isolate            | (Forti <i>et al.</i> , 2018)       |
| GA7         | CF isolate            | (Forti <i>et al.</i> , 2018)       |
| AA2         | CF isolate            | (Bragonzi <i>et al.</i> , 2009)    |
| AA43        | CF isolate            | (Bragonzi <i>et al.</i> , 2009)    |
| AA44        | CF isolate            | (Bragonzi <i>et al.</i> , 2009)    |
| TR1         | CF isolate            | (Bragonzi <i>et al.</i> , 2009)    |
| TR66        | CF isolate            | (Bragonzi <i>et al.</i> , 2009)    |
| TR67        | CF isolate            | (Bragonzi <i>et al.</i> , 2009)    |
| PaPh1       | CF isolate            | (Forti <i>et al.</i> , 2018)       |
| PaPh2       | CF isolate            | (Forti <i>et al.</i> , 2018)       |
| PaPh3       | CF isolate            | (Forti <i>et al.</i> , 2018)       |
| PaPh4       | CF isolate            | (Forti <i>et al.</i> , 2018)       |
| PaPh5       | CF isolate            | (Forti <i>et al.</i> , 2018)       |
| PaPh6       | CF isolate            | (Forti <i>et al.</i> , 2018)       |
| PaPh7       | CF isolate            | (Forti <i>et al.</i> , 2018)       |
| PaPh8       | CF isolate            | (Forti <i>et al.</i> , 2018)       |
| PaPh9       | CF isolate            | (Forti <i>et al.</i> , 2018)       |
| PaPh10      | CF isolate            | (Forti <i>et al.</i> , 2018)       |
| PaPh11      | CF isolate            | (Forti <i>et al.</i> , 2018)       |
| PaPh12      | CF isolate            | (Forti <i>et al.</i> , 2018)       |
| PaPh13      | CF isolate            | (Forti <i>et al.</i> , 2018)       |
| PaPh14      | CF isolate            | (Forti <i>et al.</i> , 2018)       |
| PaPh15      | CF isolate            | (Forti <i>et al.</i> , 2018)       |
| PaPh16      | CF isolate            | (Forti <i>et al.</i> , 2018)       |
| PaPh17      | CF isolate            | (Forti <i>et al.</i> , 2018)       |
| PaPh18      | CF isolate            | (Forti <i>et al.</i> , 2018)       |
| PaPh19      | CF isolate            | (Forti <i>et al.</i> , 2018)       |
| PaPh20      | CF isolate            | (Forti <i>et al.</i> , 2018)       |
| PaPh21      | CF isolate            | (Forti <i>et al.</i> , 2018)       |
| PaPh23      | CF isolate            | (Forti <i>et al.</i> , 2018)       |
| PaPh24      | CF isolate            | (Forti <i>et al.</i> , 2018)       |



|        |            |                              |
|--------|------------|------------------------------|
| PaPh25 | CF isolate | (Forti <i>et al.</i> , 2018) |
| PaPh26 | CF isolate | (Forti <i>et al.</i> , 2018) |
| PaPh27 | CF isolate | (Forti <i>et al.</i> , 2018) |
| PaPh28 | CF isolate | (Forti <i>et al.</i> , 2018) |
| PaPh29 | CF isolate | (Forti <i>et al.</i> , 2018) |
| PaPh30 | CF isolate | (Forti <i>et al.</i> , 2018) |
| PaPh31 | CF isolate | (Forti <i>et al.</i> , 2018) |
| PaPh32 | CF isolate | (Forti <i>et al.</i> , 2018) |
| PaPh33 | CF isolate | (Forti <i>et al.</i> , 2018) |

---

## References

- Boyer, H.W. and Roulland-dussoix, D. (1969) A complementation analysis of the restriction and modification of DNA in *Escherichia coli*. *J Mol Biol* **41**: 459–472.
- Bragonzi, A., Paroni, M., Nonis, A., Cramer, N., Montanari, S., Rejman, J., et al. (2009) *Pseudomonas aeruginosa* microevolution during cystic fibrosis lung infection establishes clones with adapted virulence. *Am J Respir Crit Care Med* **180**: 138–45.
- Cheng, K., Smyth, R.L., Govan, J.R.W., Doherty, C., Winstanley, C., Denning, N., et al. (1996) Spread of beta-lactam-resistant *Pseudomonas aeruginosa* in a cystic fibrosis clinic. *Lancet* **348**: 639–642.
- Delvillani, F., Sciandrone, B., Peano, C., Petiti, L., Berens, C., Georgi, C., et al. (2014) Tet-Trap, a genetic approach to the identification of bacterial RNA thermometers: application to *Pseudomonas aeruginosa*. *RNA* **20**: 1963–1976.
- Figuerski, D.H., Meyer, R.J., and Helinski, D.R. (1979) Suppression of *cole1* replication properties by the Inc P-1 plasmid RK2 in hybrid plasmids constructed in vitro. *J Mol Biol* **133**: 295–318.
- Forti, F., Roach, D.R., Cafora, M., Pasini, M.E., Horner, D.S., Fiscarelli, E. V., et al. (2018) Design of a broad-range bacteriophage cocktail that reduces *Pseudomonas aeruginosa* biofilms and treats acute infections in two animal models. *Antimicrob Agents Chemother* **62**: e02573-17.
- Grant, S.G.N.N., Jessee, J., Bloom, F.R., and Hanahan, D. (1990) Differential plasmid rescue from transgenic mouse DNAs into *Escherichia coli* methylation-restriction mutants. *Proc Natl Acad Sci U S A* **87**: 4645–4649.
- Herrero, M., de Lorenzo, V., and Timmis, K.N. (1990) Transposon vectors containing non-antibiotic resistance selection markers for cloning and stable chromosomal insertion of foreign genes in gram-negative bacteria. *J Bacteriol* **172**: 6557–6567.
- Jander, G., Rahme, L.G., and Ausubel, F.M. (2000) Positive correlation between virulence of *Pseudomonas aeruginosa* mutants in mice and insects. *J Bacteriol* **182**: 3843–3845.
- Kaniga, K., Delor, I., and Cornelis, G.R. (1991) A wide-host-range suicide vector for improving reverse genetics in Gram-negative bacteria: inactivation of the *blaA* gene of *Yersinia enterocolitica*. *Gene* **109**: 137–141.
- Klockgether, J., Munder, A., Neugebauer, J., Davenport, C.F., Stanke, F., Larbig, K.D., et al. (2010) Genome diversity of *Pseudomonas aeruginosa* PAO1 laboratory strains. *J Bacteriol* **192**: 1113–1121.

Li, F., Hou, C.-F.D., Lokareddy, R.K., Yang, R., Forti, F., Briani, F., and Cingolani, G. (2023) High-resolution cryo-EM structure of the *Pseudomonas* bacteriophage E217. *Nat Commun* **14**: 4052.
